# Supplementary material for: An H 2 O 2 activated Ag 2 S:In–Cu nanoprobe for in vitro synergistic tumor treatment
Source: Royal Society of Chemistry journal article supplement (doi:10.1039/d5nr04196a), 2025-12-09
Supplement: d5nr04196a1.pdf [file d5nr04196a1.pdf]

## Supporting Information

### **H<sub>2</sub>O<sub>2</sub> activated Ag<sub>2</sub>S:In-Cu nanoprobe for in vitro synergistic tumor treatment**

Xiaoyan Zhang<sup>1,#</sup>, Ruiqi Liu<sup>2,#</sup>, Zhouyu Yu<sup>1</sup>, Baisong Chang<sup>\*,1</sup>

<sup>a</sup>. State Key Laboratory of Advanced Technology for Materials Synthesis and Processing, Wuhan University of Technology, Wuhan 430070, China

<sup>b</sup>. State Key Laboratory of Drug Research, Molecular Imaging Center, Shanghai Institute of Materia Medica, Chinese Academy of Sciences, Shanghai 201203, China

# These authors contributed equally.

\* Correspondence should be addressed to B.C. (chang@whut.edu.cn)

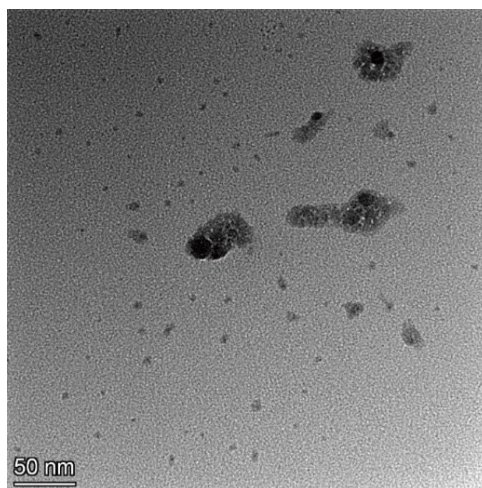

**Fig. S1** TEM image of  $\text{Ag}_2\text{S}$  nanoparticles.

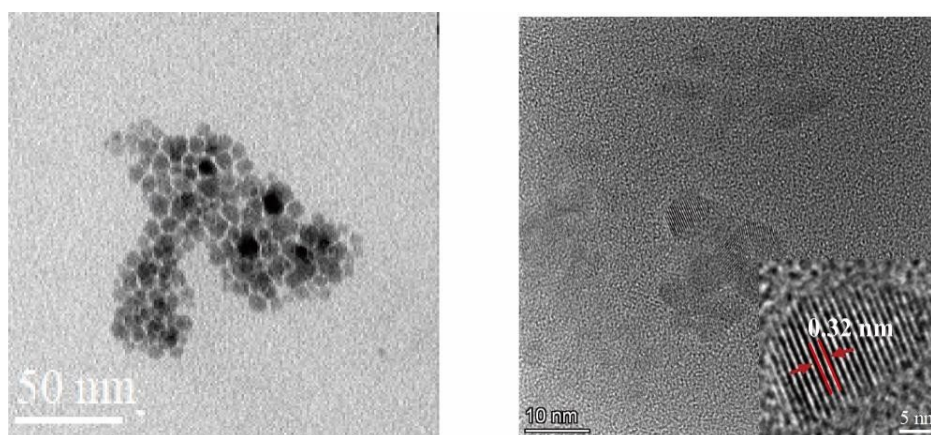

**Fig. S2** TEM and high-resolution TEM images of AIS nanoparticles.

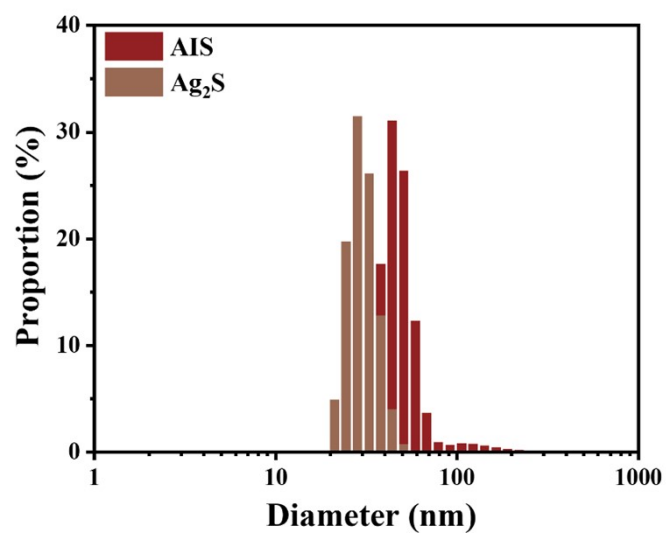

**Fig. S3** Particle size of  $\text{Ag}_2\text{S}$  and AIS nanoparticles.

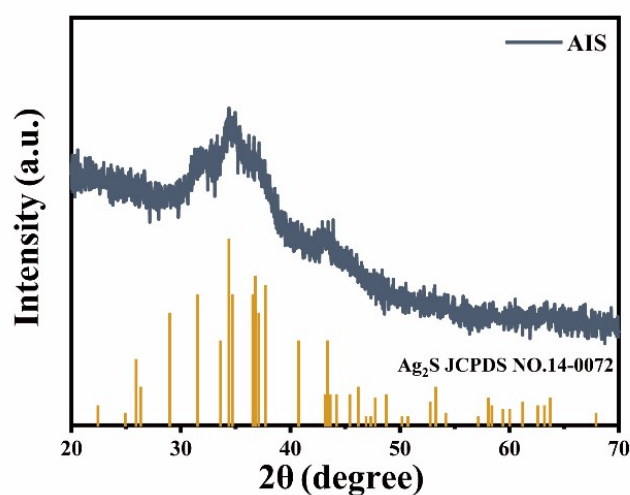

**Fig. S4** X-ray diffraction pattern of AIS nanoparticles.

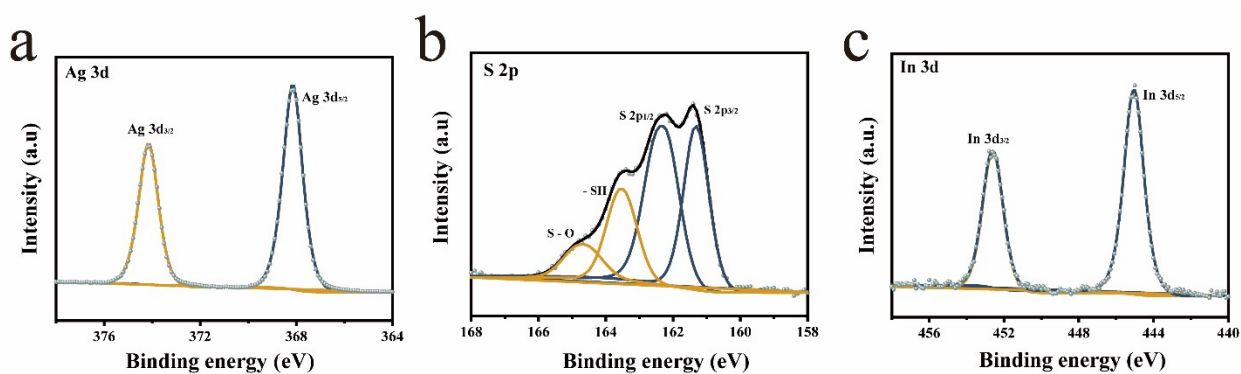

**Fig. S5** Survey and fitted XPS analysis of AIS (Ag 3d, S 2p and In 3d) nanoparticles.

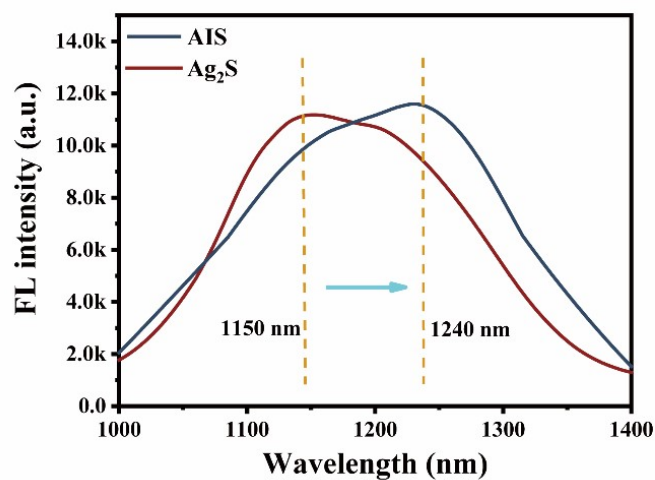

**Fig. S6** NIR-II fluorescence spectra of AIS and Ag<sub>2</sub>S nanoparticles.

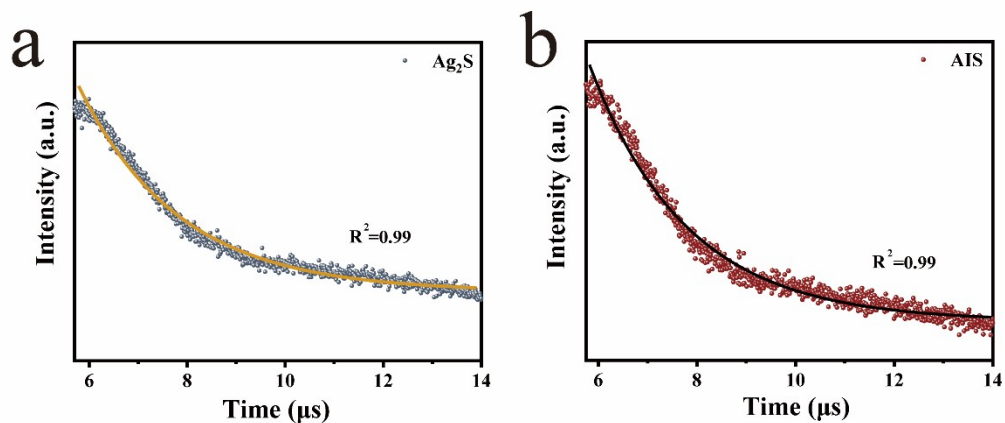

**Fig. S7** Fluorescence lifetime of (a)  $\text{Ag}_2\text{S}$  and (b) AIS.

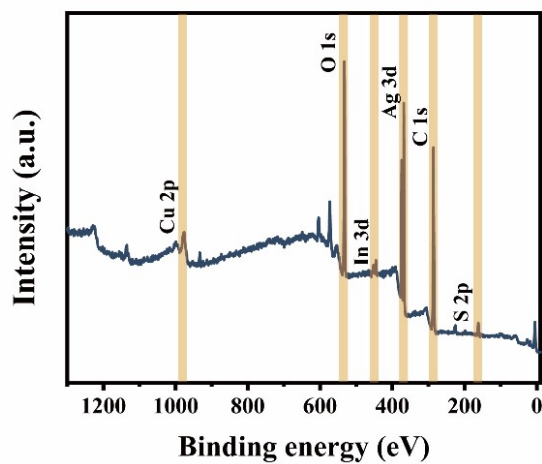

**Fig. S8** XPS full spectrum of ACP nanoparticles.

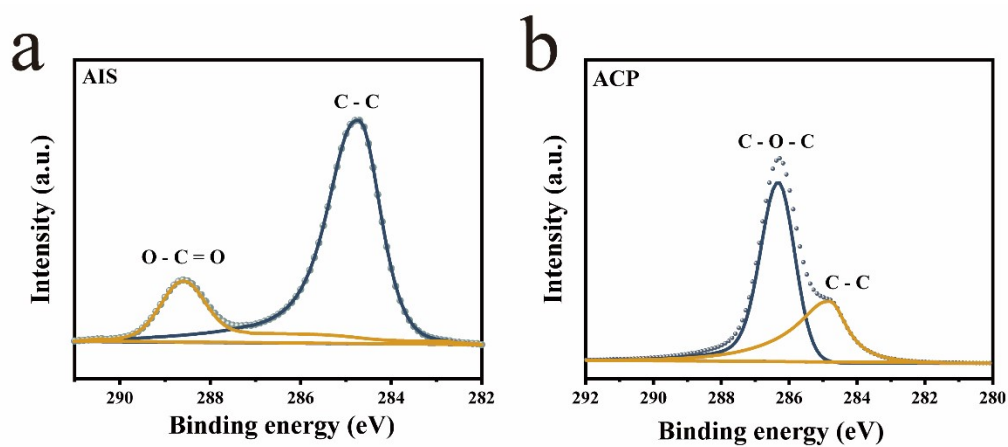

**Fig. S9** High-resolution XPS spectra of C 1s. (a) AIS. (b) ACP.

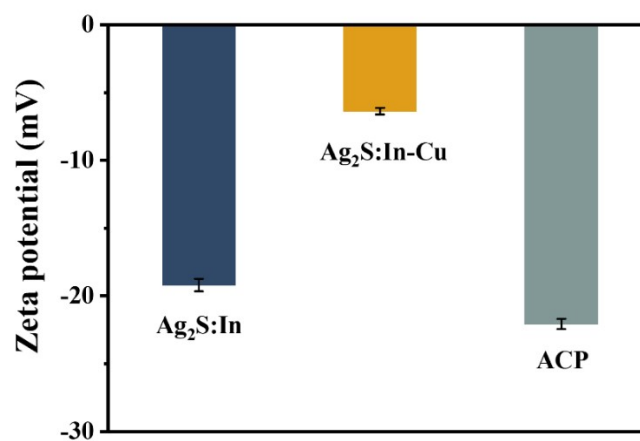

**Fig. S10** Zeta potential measurement of Ag<sub>2</sub>S:In, Ag<sub>2</sub>S:In-Cu and ACP nanoparticles.

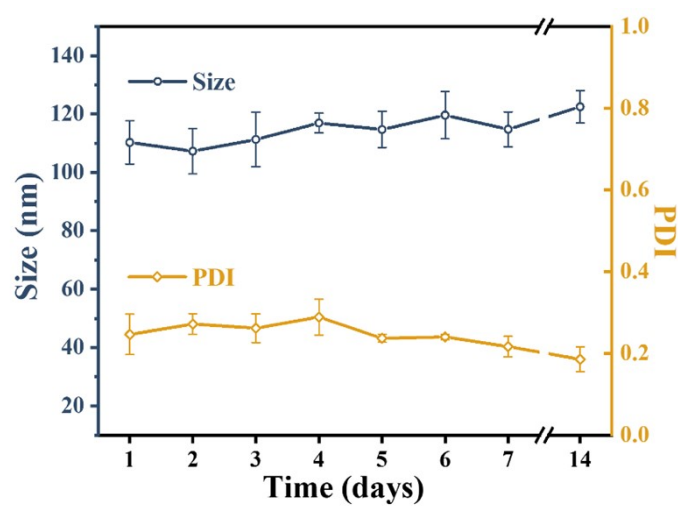

**Fig. S11** Particle size and polymer dispersity index (PDI) during 14 days of ACP nanoparticles.

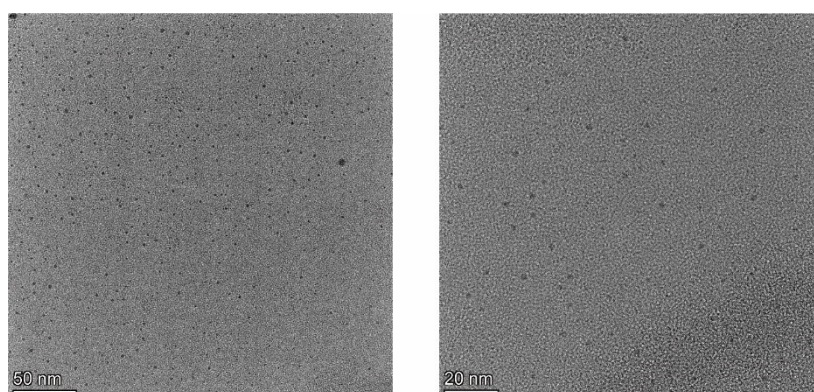

**Fig. S12** TEM images of ACP nanoparticles treated with H<sub>2</sub>O<sub>2</sub>.

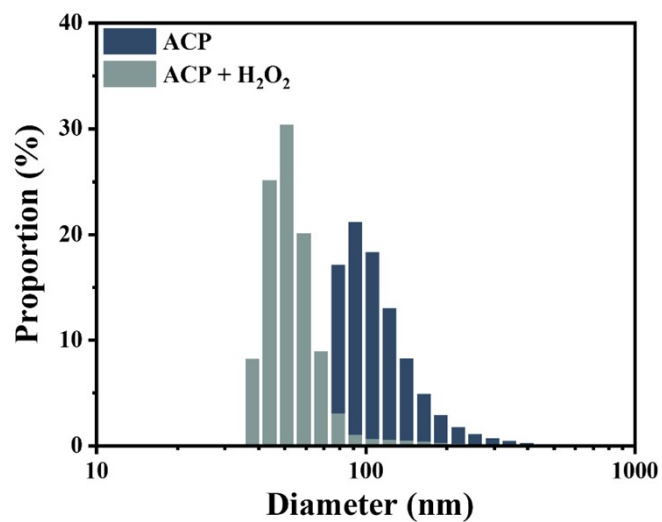

**Fig. S13** Particle size of ACP and ACP treated with H<sub>2</sub>O<sub>2</sub> nanoparticles.

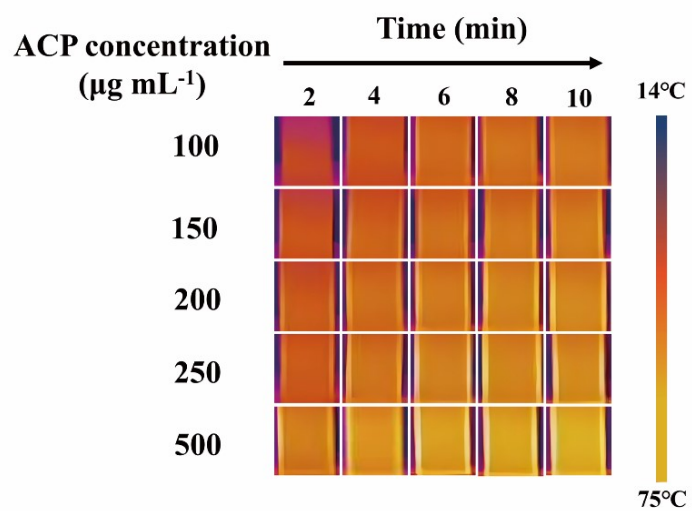

**Fig. S14** Thermal images of ACP nanoparticles at different concentrations (0 - 500 µg mL<sup>-1</sup>) under 808 nm laser irradiation for 10 min (2 W cm<sup>-2</sup>).

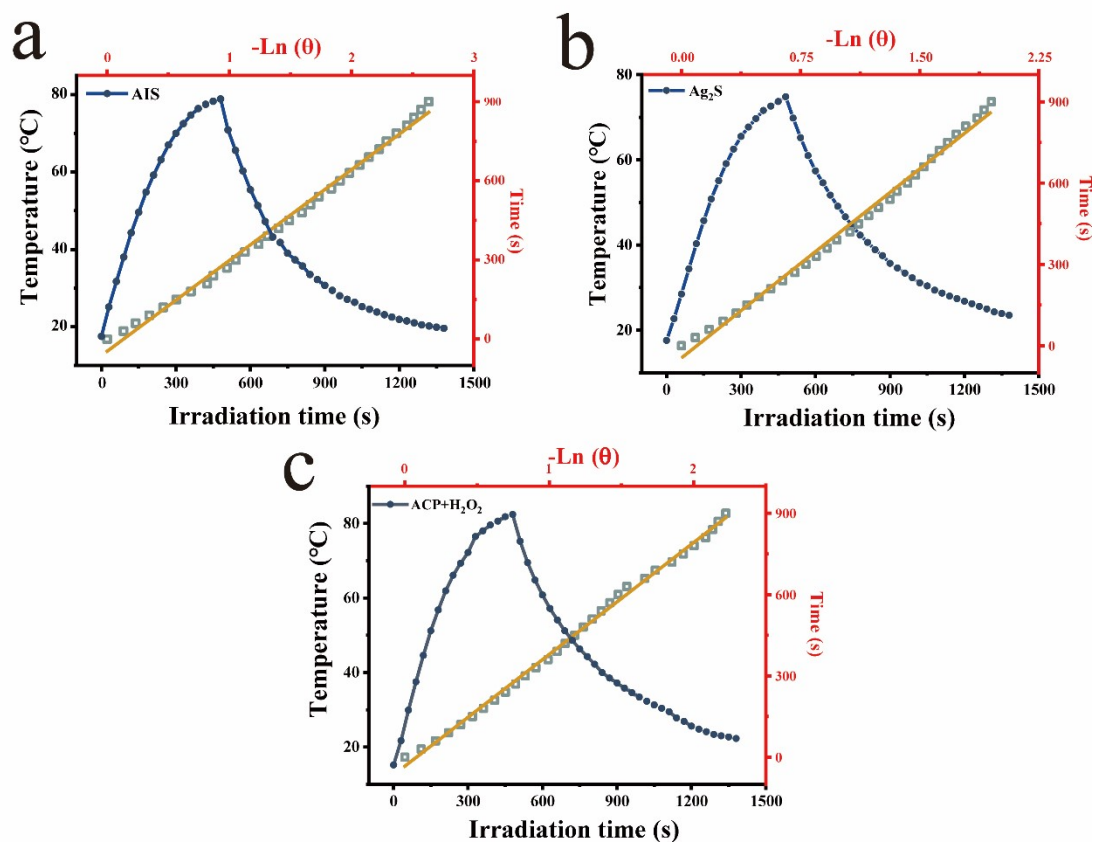

**Fig. S15** (a, b, c) Temperature plots of the heating and cooling processes of AIS nanoparticles, Ag<sub>2</sub>S nanoparticles and ACP nanoparticles treated with H<sub>2</sub>O<sub>2</sub> irradiated with an 808 nm laser (2 W cm<sup>-2</sup>), and the plot of cooling time versus negative natural logarithm of the temperature driving force obtained from cooling stage.

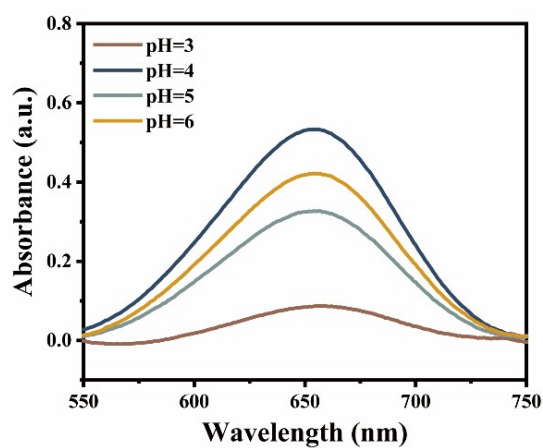

**Fig. S16** The influence of different pH on ACP nanoparticles POD-like properties.



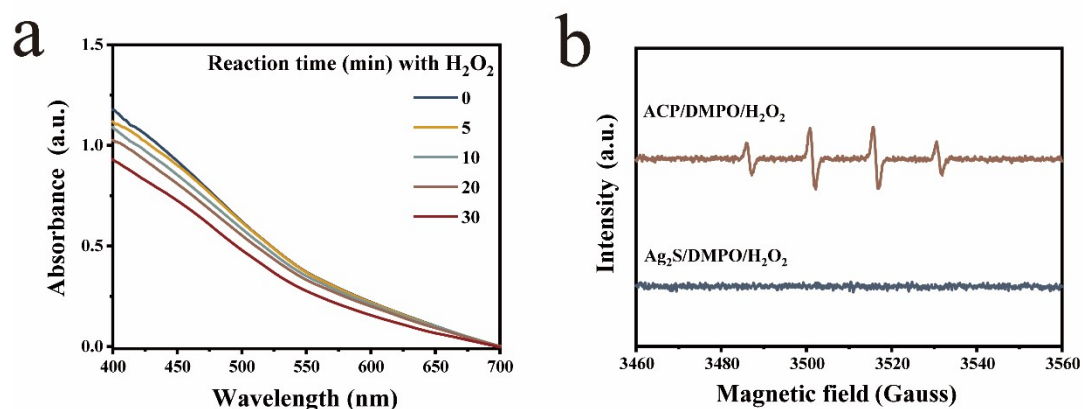

**Fig. S17** (a) UV-vis spectra of  $\text{Ag}_2\text{S}$  nanoparticles and TMB/ $\text{H}_2\text{O}_2$  at different reaction times. (b) DMPO/ $\text{H}_2\text{O}_2$  treated with ACP nanoparticles and  $\text{Ag}_2\text{S}$  nanoparticles.

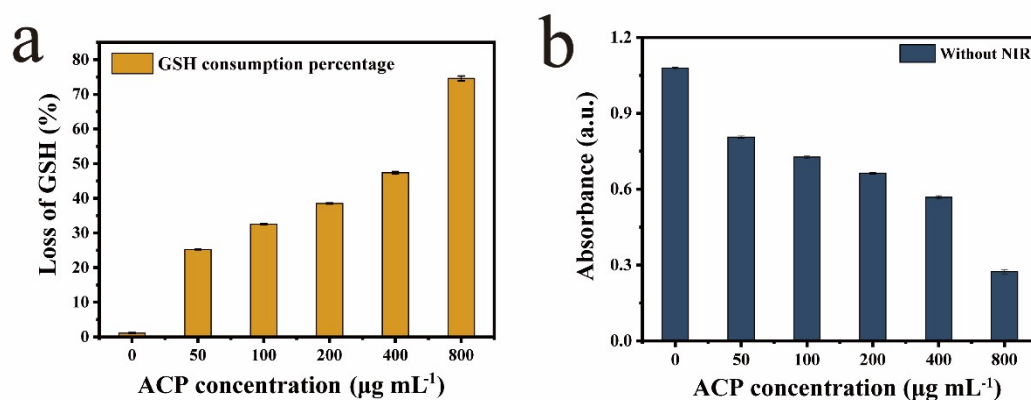

**Fig. S18** (a) The percentage of GSH consumption and (b) absorbance change at 412 nm for different concentrations of ACP nanoparticles.

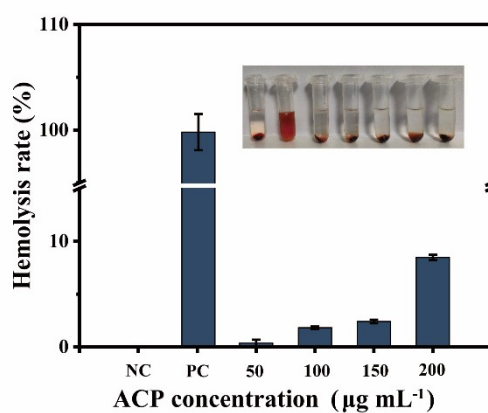

**Fig. S19** Hemolysis rates of ACP nanoparticles with 3 h of incubation with blood cells (inset: hemolysis photo after centrifugation).



**Table S1** PCE of some reported nanoparticles.

| Nanoparticles                                                   | Power density<br>(W cm <sup>-2</sup> ) | PEC (%) | Refs      |
|-----------------------------------------------------------------|----------------------------------------|---------|-----------|
| PDA@Ag nanoparticles                                            | 1.0                                    | 36.1    | [1]       |
| SDBS-Ag <sub>2</sub> Se nanoparticles                           | 1.7                                    | 22.9    | [2]       |
| Ag <sub>2</sub> S nanoparticles                                 | 1.0                                    | 38.5    | [3]       |
| Ag <sub>2</sub> S/g-C <sub>3</sub> N <sub>4</sub> nanoparticles | 2.5                                    | 31.3    | [4]       |
| BSA-Ag <sub>2</sub> S nanoparticles                             | 3.4                                    | 18.9    | [5]       |
| Ag <sub>2</sub> S nanoparticles                                 | 2.0                                    | 41.0    | [6]       |
| ACP nanoparticles                                               | 2.0                                    | 54.0    | This work |

## References

- [1] X. Qi, Y. Huang, S. You, Y. Xiang, E. Cai, R. Mao, W. Pan, X. Tong, W. Dong, F. Ye and J. Shen, *Adv. Sci.*, 2022, **9**, 2106015.
- [2] X. Yang, C. Wang, X. Zhang, Y. Wang, F. Gao, L. Sun, W. Xu, C. Qiao and G. Zhang, *Sci. Technol. Adv. Mater.*, 2020, **21**, 584-592.
- [3] S. Zhu, W. Song, Y. He, Y. Wang, X. Li, Y. Wu, X. Meng, C. Lin, W. Wang, H. Wang, S. Huang, F. Yan and L. Sun, *ACS Appl. Mater. Interfaces*, 2025, **17**, 37465-37478.
- [4] H. Wang, J. You, D. Shi, L. Cai, H. Shi and H. Shi, *ACS Appl. Nano Mater.*, 2024, **7**, 19904-19914.
- [5] J. Zhao, Q. Zhang, W. Liu, G. Shan and X. Wang, *Colloids Surf., B*, 2022, **211**, 112295.
- [6] R. Han, Y. Xiao, Q. Yang, M. Pan, Y. Hao, X. He, J. Peng and Z. Qian, *Biomaterials*, 2021, **264**, 120451.
